# Supplementary material
Source: Springer Nature journal article supplement (https://www.springermedizin.de/resource/supplementary/12933_2009_193_MOESM2_ESM.pdf/9539800)
Supplement: MOESM2 [file 9539800]

## Supplemental data Figure 2:

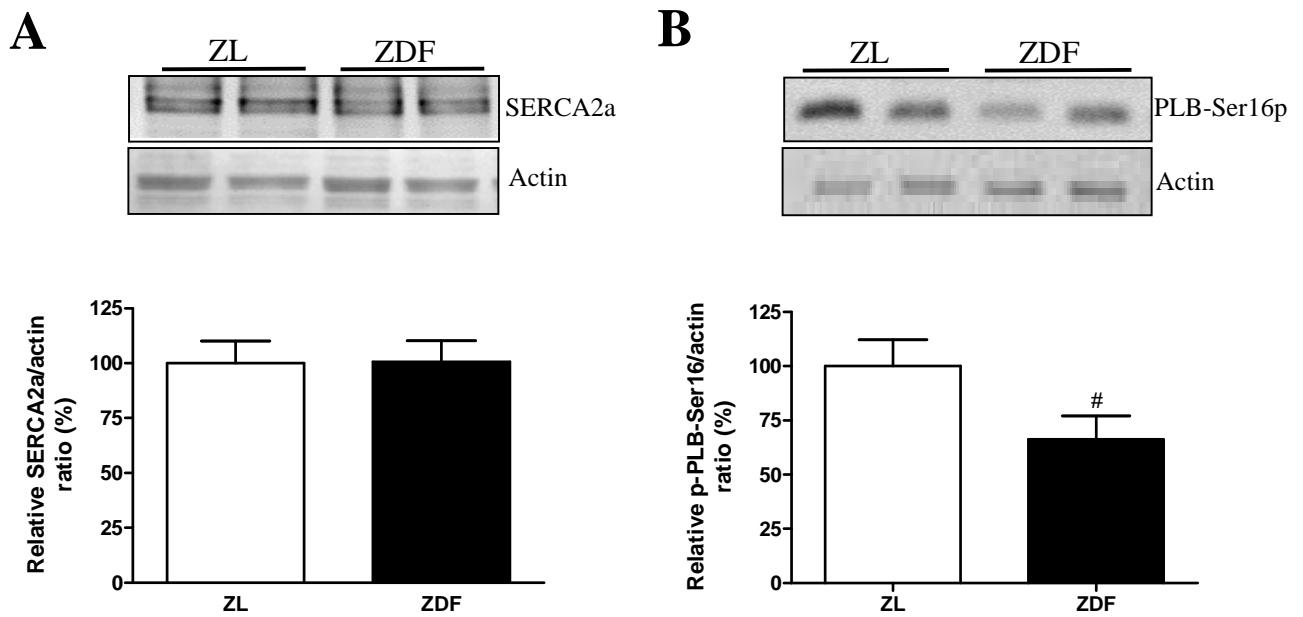

### Figure 2: Molecular alterations in calcium handling

Quantification of immunoblots showing protein expression of SERCA2a (A), and phosphorylation of phospholamban (PLB-Ser16p) (B) in ZL rats (open bars) and ZDF rats (filled bars). Data are expressed as mean  $\pm$  SEM, n=4-8, # p=0.08.
